# Supplementary material
Source: PubMed Central journal article supplement (PMC4200507)
Supplement: NIHMS628138-supplement-1.pdf [file NIHMS628138-supplement-1.pdf]

Table S1. Frequency of CD34<sup>+</sup> cells in living mononuclear cells isolated from samples of group I and group II

| Donor     | Age /Sex | Sample    | Total number of cells | Number of gated cells | Number of live cells | Number of dead cells | Number of CD34 <sup>+</sup> cells | Live cells / gated cells (%) | CD34 <sup>+</sup> cells / gated cells (%) | CD34 <sup>+</sup> cells / live cells (%) |
|-----------|----------|-----------|-----------------------|-----------------------|----------------------|----------------------|-----------------------------------|------------------------------|-------------------------------------------|------------------------------------------|
| Donor #1  | 51/M     | B-8       | 13511                 | 5864                  | 5390                 | 474                  | 20                                | 91.9168                      | 0.34106                                   | 0.37106                                  |
|           |          | Sample 5  | 10742                 | 6141                  | 3841                 | 2300                 | 8                                 | 62.5468                      | 0.13027                                   | 0.20828                                  |
| Donor #2  | 89/F     | B-3       | 102366                | 47742                 | 46026                | 1716                 | 12                                | 96.4057                      | 0.02514                                   | 0.02607                                  |
|           |          | Sample 10 | 11323                 | 3595                  | 2527                 | 1068                 | 2                                 | 70.2921                      | 0.05563                                   | 0.07915                                  |
| Donor #3  | 60/F     | B-6       | 102151                | 70343                 | 63108                | 7235                 | 16                                | 89.7147                      | 0.02275                                   | 0.02535                                  |
|           |          | Sample 6  | 11571                 | 6472                  | 5045                 | 1427                 | 5                                 | 77.9512                      | 0.07726                                   | 0.09911                                  |
| Donor #4  | 87/F     | B-5       | 106871                | 59211                 | 51925                | 7286                 | 13                                | 87.6949                      | 0.02196                                   | 0.02504                                  |
|           |          | Sample 9  | 31612                 | 14524                 | 10347                | 4177                 | 2                                 | 71.2407                      | 0.01377                                   | 0.01933                                  |
| Donor #5  | 57/F     | B-10      | 101300                | 61689                 | 54156                | 7533                 | 28                                | 87.7887                      | 0.04539                                   | 0.0517                                   |
|           |          | -         | -                     | -                     | -                    | -                    | -                                 | -                            | -                                         | -                                        |
| Donor #6  | 79/F     | B-4       | 311505                | 86398                 | 80713                | 5685                 | 47                                | 93.42                        | 0.0544                                    | 0.05823                                  |
|           |          | Sample 7  | 10702                 | 4721                  | 2563                 | 2158                 | 4                                 | 54.2893                      | 0.08473                                   | 0.15607                                  |
| Donor #7  | 28/F     | B-16      | 59660                 | 27212                 | 24854                | 2358                 | 7                                 | 91.3347                      | 0.02572                                   | 0.02816                                  |
|           |          | -         | -                     | -                     | -                    | -                    | -                                 | -                            | -                                         | -                                        |
| Donor #8  | 48/M     | B-7       | 12919                 | 7853                  | 7397                 | 456                  | 2                                 | 94.1933                      | 0.02547                                   | 0.02704                                  |
|           |          | Sample 4  | 10711                 | 5353                  | 2217                 | 3136                 | 3                                 | 41.416                       | 0.05604                                   | 0.13532                                  |
| Donor #9  | 81/M     | B-2       | 104184                | 45655                 | 40752                | 4903                 | 39                                | 89.2608                      | 0.08542                                   | 0.0957                                   |
|           |          | Sample 8  | 11806                 | 6650                  | 4809                 | 1841                 | 2                                 | 72.3158                      | 0.03008                                   | 0.04159                                  |
| Donor #10 | 27/M     | B-11      | 152612                | 59207                 | 49804                | 9403                 | 76                                | 84.1184                      | 0.12836                                   | 0.1526                                   |
|           |          | Sample 1  | 10665                 | 4156                  | 2898                 | 1258                 | 5                                 | 69.7305                      | 0.12031                                   | 0.17253                                  |
| Donor #11 | 83/M     | B-1       | 151859                | 80083                 | 72857                | 7226                 | 68                                | 90.9769                      | 0.08491                                   | 0.09333                                  |

| Donor     | Age /Sex | Sample   | Total number of cells | Number of gated cells | Number of live cells | Number of dead cells | Number of CD34 <sup>+</sup> cells | Live cells / gated cells (%) | CD34 <sup>+</sup> cells / gated cells (%) | CD34 <sup>+</sup> cells / live cells (%) |
|-----------|----------|----------|-----------------------|-----------------------|----------------------|----------------------|-----------------------------------|------------------------------|-------------------------------------------|------------------------------------------|
|           |          | -        | -                     | -                     | -                    | -                    | -                                 | -                            | -                                         | -                                        |
| Donor #12 | 21/M     | B-12     | 106046                | 57860                 | 53145                | 4715                 | 27                                | 91.851                       | 0.04666                                   | 0.0508                                   |
|           |          | -        | -                     | -                     | -                    | -                    | -                                 | -                            | -                                         | -                                        |
| Donor #13 | 32/F     | B-15     | 114404                | 92898                 | 87518                | 5380                 | 4                                 | 94.2087                      | 0.00431                                   | 0.00457                                  |
|           |          | -        | -                     | -                     | -                    | -                    | -                                 | -                            | -                                         | -                                        |
| Donor #14 | 37/M     | Sample 2 | 11844                 | 4466                  | 3036                 | 1430                 | 3                                 | 67.9803                      | 0.06717                                   | 0.09881                                  |
|           |          | -        | -                     | -                     | -                    | -                    | -                                 | -                            | -                                         | -                                        |
| Donor #15 | 42/F     | Sample 3 | 5000000               | 120288                | 65831                | 54457                | 65                                | 54.7278                      | 0.05404                                   | 0.09874                                  |
|           |          | -        | -                     | -                     | -                    | -                    | -                                 | -                            | -                                         | -                                        |

Note: Samples from the same donors that were included in group I and group II were represented marked by “Sample” and “B-”, respectively. These donors were maternally related and were from Family B described in Yao et al. [15]. The gating for living cells and CD34<sup>+</sup> cells was defined in Figure 1.
