# Supplementary material
Source: PubMed Central journal article supplement (PMC4200507)
Supplement: NIHMS628138-supplement-2.pdf [file NIHMS628138-supplement-2.pdf]

Table S2. mtDNA sequence variations in single CD34<sup>+</sup> cells isolated from group I samples

| Sample    | Sequence variation                  | No. | No. of haplotypes | No. of haplotypes defined by nucleotide substitutions |
|-----------|-------------------------------------|-----|-------------------|-------------------------------------------------------|
| Sample 5  | Aggregate sequence                  | 36  | 1                 |                                                       |
|           | +16086T>Y, 9C/10C                   | 1   | 2                 | 1                                                     |
|           | +16131T>Y, 8C/9C/10C/11C            | 1   | 3                 | 2                                                     |
|           | +16150C>Y, 9C/10C/11C               | 1   | 4                 | 3                                                     |
|           | +16181A>A/C, 9C/10C/11C             | 1   | 5                 | 4                                                     |
|           | +16519T>Y, 9C/10C/11C               | 1   | 6                 | 5                                                     |
|           | 8C/9C/10C/11C                       | 1   | 7                 |                                                       |
|           | 8C/9C/10C/11C/12C                   | 1   | 8                 |                                                       |
|           | 9C/10C                              | 19  | 9                 |                                                       |
|           | 9C/10C/11C/12C                      | 34  | 10                |                                                       |
| Sample 10 | Aggregate sequence                  | 34  | 1                 |                                                       |
|           | +16034G>R, 9C/10C/11C/12C           | 1   | 2                 | 1                                                     |
|           | +16072C>Y, 9C/10C/11C               | 1   | 3                 | 2                                                     |
|           | +16081A>R, 16445T>Y, 9C/10C/11C/12C | 1   | 4                 | 3                                                     |
|           | +16086T>Y, 9C/10C/11C               | 1   | 5                 | 4                                                     |
|           | +16124T>C, 9C/10C/11C               | 1   | 6                 | 7                                                     |
|           | +16129G>R, 9C/10C/11C/12C           | 1   | 7                 | 6                                                     |
|           | +16131T>C, 9C/10C                   | 2   | 8                 | 7                                                     |
|           | +16131T>C, 9C/10C/11C               | 1   | 9                 |                                                       |
|           | +16468T>Y, 9C/10C/11C/12C           | 1   | 10                | 8                                                     |
|           | +204T>Y, 9C/10C/11C/12C             | 1   | 11                | 9                                                     |
|           | +226T>Y, 9C/10C                     | 1   | 12                | 10                                                    |
|           | +302A>R, 9C/10C/11C/12C             | 1   | 13                | 11                                                    |
|           | +303C>C/A, 9C/10C/11C/12C           | 1   | 14                | 12                                                    |
|           | +303insA, 8C/9C/10C/11C             | 1   | 15                |                                                       |
|           | +405T>C, 466T>C, 9C/10C/11C/12C     | 1   | 16                | 13                                                    |
|           | +405T>C, 9C/10C/11C/12C             | 1   | 17                | 14                                                    |
|           | 8C/9C/10C                           | 1   | 18                |                                                       |
|           | 8C/9C/10C/11C                       | 3   | 19                |                                                       |
|           | 8C/9C/10C/11C/12C                   | 1   | 20                |                                                       |
|           | 9C/10C                              | 8   | 21                |                                                       |
|           | 9C/10C/11C                          | 31  | 22                |                                                       |
| Sample 6  | Aggregate sequence                  | 40  | 1                 |                                                       |
|           | +16018T>Y, 9C/10C/11C/12C           | 1   | 2                 | 1                                                     |
|           | +16250C>Y, 9C/10C                   | 1   | 3                 | 2                                                     |

|          |                                         |    |    |    |
|----------|-----------------------------------------|----|----|----|
|          | +182C>Y, 9C/10C/11C                     | 1  | 4  | 3  |
|          | +204T>Y, 9C/10C/11C                     | 1  | 5  | 4  |
|          | +270A, 9C/10C                           | 1  | 6  | 5  |
|          | +405T>C, 9C/10C/11C                     | 1  | 7  | 6  |
|          | +418C>Y, 9C/10C/11C/12C                 | 1  | 8  | 7  |
|          | +445C>Y, 9C/10C/11C/12C                 | 1  | 9  | 8  |
|          | +513G>A, 9C/10C/11C/12C                 | 1  | 10 | 9  |
|          | +573insC/non-ins, 9C/10C/11C/12C        | 1  | 11 |    |
|          | +574A>R, 9C/10C/11C/12C                 | 1  | 12 | 10 |
|          | +(523-524)delAC/non-del, 9C/10C/11C     | 1  | 13 |    |
|          | +(523-524)delAC/non-del, 9C/10C/11C/12C | 1  | 14 |    |
|          | 8C/9C/10C                               | 1  | 15 |    |
|          | 8C/9C/10C/11C                           | 1  | 16 |    |
|          | 8C/9C/10C/11C/12C                       | 1  | 17 |    |
|          | 9C/10C                                  | 18 | 18 |    |
|          | 9C/10C/11C                              | 21 | 19 |    |
| Sample 9 | Aggregate sequence                      | 44 | 1  |    |
|          | +16095C>Y, 9C/10C/11C/12C               | 1  | 2  | 1  |
|          | +16129G>A, 9C/10C/11C/12C               | 1  | 3  | 2  |
|          | +16287C>Y, 308C>Y, 9C/10C/11C           | 1  | 4  | 3  |
|          | +16301C>Y, 9C/10C                       | 1  | 5  | 4  |
|          | +217T>C, 9C/10C/11C                     | 1  | 6  | 5  |
|          | +260G>R, 9C/10C/11C/12C                 | 1  | 7  | 6  |
|          | +308C>Y, 9C/10C/11C                     | 1  | 8  | 7  |
|          | +405T>C, 9C/10C/11C                     | 1  | 9  | 8  |
|          | 8C/9C/10C                               | 1  | 10 |    |
|          | 8C/9C/10C/11C                           | 5  | 11 |    |
|          | 9C/10C                                  | 8  | 12 |    |
|          | 9C/10C/11C                              | 29 | 13 |    |

Note: Sequence variation was scored relative to the Cambridge reference sequence [1]. A site heterogeneous for both thymidine (T) and cytidine (C) was abbreviated as Y, and heterogeneous for adenosine (A) and guanosine (G) was abbreviated as R. A site heterogeneous for a transversion or an indel (insertion and deletion) was highlighted by listing all status. We followed the approach in our previous studies [14, 16] to highlight the status of the C-tract length variations in region 303-309 and the dinucleotide AC repeat in region 515-524 in these cells differ from the aggregated sequence by listing all the status, e.g. 9C/10C means region 303-315 has heteroplasmy of CCCCCCCCCCTCCCCC and CCCCCCCCCCTCCCCC in the cell, 523-524delAC/non-del means co-existing of 4 and 5 repeats of AC in region 515-524 in the cell. +, extra mtDNA changes compared with the aggregate sequence. The aggregate sequence of Sample 5 contains 9C/10C/11C, whereas the other three samples all contain 9C/10C/11C/12C. The sequence variations in single CD34<sup>+</sup> cells isolated from group II samples (B-8, B-3, B-6 and B-5) were reported in Yao et al. [15].
